# Supplementary material
Source: PubMed Central journal article supplement (PMC2654182)

## Supporting Information

**Figure S1.** 100  $\mu$ L of BARD1(423-777) at 4 mg/mL in 50 mM tris-HCl pH 7.5, 100mM NaCl was injected on to a Superose 12 10/300 size exclusion column at 0.2 mL/minute. In-line with the column were DAWN EOS MALLS and Optilab rEX differential refractive index detectors (Wyatt Technologies, Santa Barbara, CA). The MALLS data were analyzed using the program ASTRA 4.90. BARD1(423-777) eluted as a monomer with molar mass moments  $M_n$ ,  $M_w$  and  $M_z$  of  $3.67 \times 10^4$  (2.5%),  $3.70 \times 10^4$  (2.6%) and  $3.73 \times 10^4$  (5%) g/mol. The previously calibrated void volume on this column elutes at 40 minutes. A plot of molar mass vs time over the BARD1 peak is shown superimposed on the differential refractive index trace between 30 and 120 minutes.

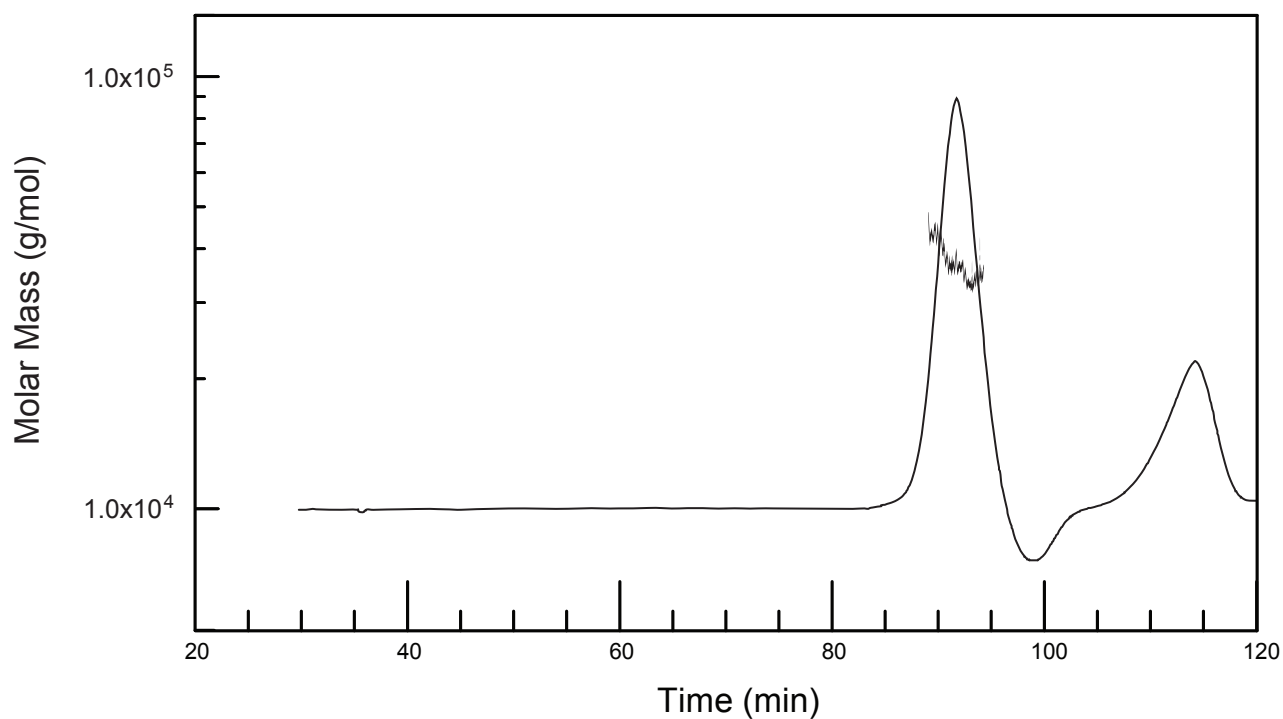

Supplement: bi801115g_si_001.pdf [file bi801115g_si_001.pdf]
